# Supplementary material for: Evolutionary history of the endemic water shrew Neomys anomalus: Recurrent phylogeographic patterns in semi‐aquatic mammals of the Iberian Peninsula
Source: PubMed Central journal article supplement (PMC6206195; doi:10.1002/ece3.4487), 2018-09-27
Supplement: ECE3-8-10138-s001.pdf [file ECE3-8-10138-s001.pdf]

## **SUPPORTING INFORMATION**

Ecology and Evolution

**Evolutionary history of the endemic water shrew *Neomys anomalus*: recurrent phylogeographic patterns in semi-aquatic mammals of the Iberian Peninsula**

Marina Querejeta and Jose Castresana

**Table S1.** Samples used in this study with information about location, river basin, collection year, mitochondrial phylogroup, sample type and genes sequenced in each sample. Samples of a previous study (Igea et al. 2015) are also included.

| Specimen Code | Latitude | Longitude | Basin | Year | Phylogroup | Sample type      | Cytochrome <i>b</i> | D-loop |
|---------------|----------|-----------|-------|------|------------|------------------|---------------------|--------|
| IBE-C326      | 43.10042 | -5.0077   | Duero | 2009 | B          | Faeces           | yes                 | yes    |
| IBE-C331      | 43.19352 | -4.90761  | Deva  | 2009 | A1         | Faeces           | yes                 | yes    |
| IBE-C333      | 43.31652 | -4.85735  | Deva  | 2009 | B          | Faeces           | yes                 | yes    |
| IBE-C360      | 43.25681 | -4.7649   | Deva  | 2009 | B          | Faeces           | yes                 | yes    |
| IBE-C370      | 43.11025 | -4.74269  | Deva  | 2009 | B          | Faeces           | yes                 | no     |
| IBE-C385      | 43.22616 | -5.03102  | Sella | 2009 | B          | Faeces           | yes                 | no     |
| IBE-C524      | 43.05728 | -6.24462  | Nalón | 2009 | A1         | Faeces           | yes                 | yes    |
| IBE-C529      | 42.08666 | -6.71346  | Duero | 2010 | A1         | Faeces           | yes                 | yes    |
| IBE-C544      | 43.10209 | -5.80897  | Nalón | 2009 | A1         | Faeces           | yes                 | yes    |
| IBE-C568      | 42.98546 | -6.00301  | Duero | 2009 | A1         | Faeces           | yes                 | yes    |
| IBE-C573      | 43.01    | -6.22696  | Miño  | 2009 | A1         | Faeces           | yes                 | no     |
| IBE-C597      | 42.97739 | -4.18256  | Ebro  | 2010 | B          | Faeces           | yes                 | yes    |
| IBE-C630      | 43.25778 | -4.26971  | Saja  | 2009 | B          | Faeces           | yes                 | no     |
| IBE-C637      | 43.20201 | -4.29735  | Saja  | 2009 | B          | Faeces           | yes                 | no     |
| IBE-C688      | 43.14253 | -5.05624  | Sella | 2009 | B          | Faeces           | yes                 | no     |
| IBE-C690      | 43.12679 | -5.03696  | Sella | 2009 | A1         | Faeces           | yes                 | no     |
| IBE-C692      | 43.25934 | -4.80843  | Deva  | 2009 | B          | Faeces           | yes                 | yes    |
| IBE-C698      | 43.14565 | -4.91028  | Deva  | 2009 | A1         | Faeces           | yes                 | yes    |
| IBE-C740      | 43.25385 | -4.83628  | Deva  | 2009 | B          | Faeces           | yes                 | no     |
| IBE-C748      | 43.18185 | -4.99829  | Sella | 2009 | A1         | Faeces           | yes                 | yes    |
| IBE-C761      | 43.02841 | -4.21989  | Ebro  | 2009 | B          | Faeces           | yes                 | no     |
| IBE-C785      | 42.75127 | -8.41541  | Ulla  | 2010 | A1         | Faeces           | yes                 | no     |
| IBE-C825      | 41.58792 | -7.80231  | Duero | 2010 | A1         | Faeces           | yes                 | yes    |
| IBE-C843      | 41.63747 | -7.8033   | Duero | 2010 | A1         | Faeces           | yes                 | yes    |
| IBE-C1029     | 42.97746 | -4.7547   | Duero | 2010 | B          | Faeces           | yes                 | yes    |
| IBE-C1054     | 42.10114 | -2.90045  | Ebro  | 2011 | B          | Faeces           | yes                 | no     |
| IBE-C1061     | 42.12813 | -2.9273   | Ebro  | 2011 | B          | Faeces           | yes                 | yes    |
| IBE-C1114     | 42.949   | -4.75971  | Duero | 2010 | B          | Faeces           | yes                 | no     |
| IBE-C1144     | 43.10283 | -6.64592  | Nalón | 2010 | A1         | Igea et al. 2015 | yes                 | no     |
| IBE-C1435     | 41.71436 | -4.98809  | Duero | 2010 | A2b        | Igea et al. 2015 | yes                 | no     |
| IBE-C1510     | 40.33764 | -5.76692  | Tajo  | 2010 | A2a        | Faeces           | yes                 | yes    |
| IBE-C1515     | 40.3709  | -5.75221  | Tajo  | 2010 | A2a        | Faeces           | yes                 | yes    |
| IBE-C1516     | 42.08723 | -6.72401  | Duero | 2010 | B          | Faeces           | yes                 | yes    |
| IBE-C1518     | 40.48633 | -6.00621  | Tajo  | 2010 | A2a        | Faeces           | yes                 | yes    |
| IBE-C1520     | 40.51167 | -6.13109  | Tajo  | 2010 | A2a        | Faeces           | yes                 | yes    |
| IBE-C1662     | 41.97124 | -2.61497  | Duero | 2010 | B          | Igea et al. 2015 | yes                 | yes    |
| IBE-C1683     | 42.16723 | -6.6566   | Duero | 2010 | A1         | Igea et al. 2015 | yes                 | yes    |
| IBE-C1750     | 40.34456 | -5.76397  | Tajo  | 2010 | A2a        | Faeces           | yes                 | no     |
| IBE-C1789     | 40.26076 | -5.52136  | Duero | 2008 | A2a        | Igea et al. 2015 | yes                 | no     |
| IBE-C1856     | 43.20814 | -5.19865  | Sella | 2010 | B          | Faeces           | yes                 | no     |
| IBE-C2520     | 43.10003 | -5.57721  | Nalón | 2011 | A1         | Faeces           | yes                 | yes    |
| IBE-C2604     | 40.89207 | 0.1101    | Ebro  | 2011 | A2b        | Faeces           | yes                 | no     |

|             |          |          |       |      |     |                  |     |     |
|-------------|----------|----------|-------|------|-----|------------------|-----|-----|
| IBE-C2605   | 43.10958 | -5.22665 | Nalón | 2011 | B   | Faeces           | yes | no  |
| IBE-C2664   | 40.66073 | -0.19369 | Ebro  | 2011 | A2b | Igea et al. 2015 | yes | yes |
| IBE-C2843   | 40.27592 | -5.23156 | Duero | 2011 | A2a | Faeces           | yes | yes |
| IBE-C3230   | 41.67061 | -7.46992 | Duero | 2011 | A1  | Faeces           | yes | no  |
| IBE-C3237   | 43.17402 | -5.39107 | Nalón | 2011 | B   | Faeces           | yes | yes |
| IBE-C3244   | 41.3685  | -7.7885  | Duero | 2011 | A1  | Faeces           | yes | yes |
| IBE-C3247   | 43.05733 | -5.55589 | Nalón | 2011 | A1  | Faeces           | yes | no  |
| IBE-C3262   | 40.33895 | -5.13038 | Duero | 2011 | A2b | Faeces           | yes | yes |
| IBE-C3271   | 41.57444 | -7.67904 | Duero | 2011 | A1  | Faeces           | yes | no  |
| IBE-C3273   | 43.04699 | -5.27944 | Duero | 2011 | B   | Faeces           | yes | yes |
| IBE-C3330   | 40.3163  | -5.41582 | Duero | 2011 | A2b | Faeces           | yes | yes |
| IBE-C3350   | 40.36109 | -5.26672 | Duero | 2011 | A2a | Faeces           | yes | yes |
| IBE-C3394   | 43.16645 | -4.65828 | Deva  | 2011 | B   | Faeces           | yes | yes |
| IBE-C3430   | 42.18963 | -2.92848 | Ebro  | 2011 | B   | Faeces           | yes | no  |
| IBE-C3456   | 42.22131 | -2.65816 | Ebro  | 2011 | B   | Faeces           | yes | no  |
| IBE-C3458   | 42.10397 | -2.70577 | Ebro  | 2011 | B   | Faeces           | yes | no  |
| IBE-C3463   | 42.12746 | -2.47893 | Ebro  | 2011 | B   | Faeces           | yes | yes |
| IBE-C3493   | 43.17028 | -6.14498 | Nalón | 2012 | A1  | Faeces           | yes | yes |
| IBE-C3611   | 42.90949 | -5.39537 | Duero | 2011 | B   | Faeces           | yes | yes |
| IBE-C3617   | 42.97483 | -5.55803 | Duero | 2011 | A1  | Faeces           | yes | no  |
| IBE-C3690   | 43.14796 | -5.9559  | Nalón | 2012 | A1  | Faeces           | yes | no  |
| IBE-C3794   | 42.68339 | -8.28367 | Ulla  | 2013 | A1  | Faeces           | yes | yes |
| IBE-C3946   | 43.07209 | -5.02095 | Duero | 2012 | A1  | Faeces           | yes | yes |
| IBE-C3947   | 43.05577 | -5.09282 | Duero | 2012 | B   | Faeces           | yes | yes |
| IBE-C4023   | 43.05696 | -3.73039 | Ebro  | 2012 | B   | Faeces           | yes | yes |
| IBE-C4042   | 43.12651 | -3.61119 | Ebro  | 2012 | B   | Faeces           | yes | no  |
| IBE-C4090   | 41.50399 | -3.77884 | Duero | 2013 | A2b | Tissue           | yes | yes |
| IBE-C4337   | 42.99514 | -2.83592 | Ebro  | 2014 | B   | Faeces           | yes | yes |
| IBE-C4339   | 43.11491 | -3.67615 | Ebro  | 2014 | B   | Faeces           | yes | yes |
| IBE-C4347   | 42.99513 | -2.83591 | Ebro  | 2014 | B   | Faeces           | yes | yes |
| IBE-C4487   | 42.1603  | -3.1695  | Duero | 2014 | B   | Faeces           | yes | yes |
| IBE-C4499   | 42.09864 | -3.06499 | Duero | 2014 | B   | Faeces           | yes | yes |
| IBE-C4505   | 42.012   | -3.01823 | Duero | 2014 | B   | Faeces           | yes | yes |
| IBE-C4511   | 42.06634 | -3.03681 | Ebro  | 2014 | B   | Faeces           | yes | yes |
| IBE-C4515   | 43.37716 | -6.36027 | Nalón | 2015 | A1  | Tissue           | yes | yes |
| IBE-C4618   | 41.03733 | -3.8249  | Duero | 2015 | A2b | Faeces           | yes | yes |
| IBE-S1920   | 42.76235 | -2.5866  | Ebro  | 2009 | B   | Faeces           | yes | no  |
| VM77-31-B   | 42.20373 | -3.27355 | Duero | 2014 | B   | Faeces           | yes | yes |
| WM04-SO61-B | 41.96772 | -2.92292 | Duero | 2014 | B   | Faeces           | yes | yes |
| WM04-SO63-B | 41.9882  | -2.9154  | Duero | 2014 | B   | Faeces           | yes | yes |
| WM05-01-A   | 42.08181 | -2.97969 | Ebro  | 2014 | B   | Faeces           | yes | yes |
| XX23-02-A   | 40.85048 | -3.94726 | Tajo  | 2014 | A2b | Faeces           | yes | yes |
| IBE-BC0112  | 42.70769 | -6.78053 | Miño  | 2014 | A1  | Faeces           | yes | yes |
| IBE-BC0121  | 40.32854 | -4.91813 | Tajo  | 2014 | A2a | Faeces           | yes | yes |
| IBE-BC0201  | 40.50271 | -6.2179  | Duero | 2014 | A2a | Faeces           | yes | yes |
| IBE-BC0209  | 42.84774 | -5.67969 | Duero | 2014 | A1  | Faeces           | yes | yes |
| IBE-BC0246  | 40.28092 | -6.77457 | Duero | 2014 | A2a | Faeces           | yes | yes |

|            |          |          |         |      |     |        |     |     |
|------------|----------|----------|---------|------|-----|--------|-----|-----|
| IBE-BC0254 | 40.33267 | -5.76922 | Tajo    | 2014 | A2a | Faeces | yes | yes |
| IBE-BC0304 | 43.0111  | -5.30854 | Duero   | 2014 | B   | Faeces | yes | yes |
| IBE-BC0357 | 40.50319 | -6.21647 | Duero   | 2014 | A2a | Faeces | yes | yes |
| IBE-BC0359 | 42.8479  | -5.68013 | Duero   | 2014 | A1  | Faeces | yes | yes |
| IBE-BC0374 | 40.34232 | -5.7647  | Tajo    | 2014 | A2a | Faeces | yes | yes |
| IBE-BC0396 | 42.9575  | -5.76094 | Duero   | 2014 | A1  | Faeces | yes | yes |
| IBE-BC0407 | 40.49979 | -6.23006 | Duero   | 2014 | A2a | Faeces | yes | yes |
| IBE-BC0416 | 40.4869  | -6.06411 | Tajo    | 2014 | A2a | Faeces | yes | yes |
| IBE-BC0530 | 40.49129 | -6.03258 | Tajo    | 2014 | A2a | Faeces | yes | yes |
| IBE-BC0540 | 42.8479  | -5.68013 | Duero   | 2014 | A1  | Faeces | yes | yes |
| IBE-BC0589 | 40.31703 | -5.13832 | Duero   | 2014 | A2b | Faeces | yes | yes |
| IBE-BC0592 | 42.84783 | -5.68012 | Duero   | 2014 | A1  | Faeces | yes | yes |
| IBE-BC0632 | 42.93044 | -5.5607  | Duero   | 2014 | B   | Faeces | yes | yes |
| IBE-BC0642 | 42.95808 | -5.76149 | Duero   | 2014 | A1  | Faeces | yes | yes |
| IBE-BC0662 | 42.96648 | -5.42442 | Duero   | 2014 | A1  | Faeces | yes | yes |
| IBE-BC0694 | 43.054   | -5.32041 | Duero   | 2014 | B   | Faeces | yes | yes |
| IBE-BC0708 | 42.84783 | -5.68058 | Duero   | 2014 | A1  | Faeces | yes | yes |
| IBE-BC0715 | 42.91698 | -5.53824 | Duero   | 2014 | A1  | Faeces | yes | yes |
| IBE-BC0716 | 42.96655 | -5.42442 | Duero   | 2014 | B   | Faeces | yes | yes |
| IBE-BC0720 | 43.06115 | -5.37404 | Duero   | 2014 | A1  | Faeces | yes | yes |
| IBE-BC0726 | 42.88462 | -5.46132 | Duero   | 2014 | A1  | Faeces | yes | yes |
| IBE-BC0750 | 42.99805 | -5.25956 | Duero   | 2014 | B   | Faeces | yes | yes |
| IBE-BC0781 | 42.84788 | -5.68057 | Duero   | 2014 | A1  | Faeces | yes | yes |
| IBE-BC0874 | 42.93563 | -4.24247 | Duero   | 2014 | B   | Faeces | yes | yes |
| IBE-BC0907 | 42.84849 | -6.21617 | Duero   | 2014 | A1  | Faeces | yes | yes |
| IBE-BC0908 | 42.73962 | -6.20847 | Miño    | 2014 | A1  | Faeces | yes | yes |
| IBE-BC0949 | 42.73718 | -6.19317 | Miño    | 2014 | A1  | Faeces | yes | yes |
| IBE-BC1027 | 42.92745 | -5.08191 | Duero   | 2014 | B   | Faeces | yes | yes |
| IBE-BC1072 | 42.92961 | -5.11575 | Duero   | 2014 | B   | Faeces | yes | yes |
| IBE-BC1330 | 40.48571 | -7.41484 | Mondego | 2015 | A1  | Faeces | yes | yes |
| IBE-BC1339 | 40.38271 | -7.54584 | Tajo    | 2015 | A2a | Faeces | yes | yes |
| IBE-BC1382 | 40.52997 | -7.49779 | Mondego | 2015 | A1  | Faeces | yes | yes |
| IBE-BC1399 | 41.08402 | -3.42982 | Tajo    | 2015 | A2b | Faeces | yes | yes |
| IBE-BC1405 | 40.46776 | -7.59768 | Mondego | 2015 | A1  | Faeces | yes | yes |
| IBE-BC1414 | 41.11642 | -3.49308 | Tajo    | 2015 | B   | Faeces | yes | yes |
| IBE-BC1416 | 40.5303  | -7.49747 | Mondego | 2015 | A2a | Faeces | yes | yes |
| IBE-BC1417 | 41.21845 | -3.29172 | Tajo    | 2015 | B   | Faeces | yes | yes |
| IBE-BC1432 | 41.10345 | -3.48929 | Tajo    | 2015 | A2b | Faeces | yes | yes |
| IBE-BC1436 | 41.16917 | -3.37749 | Tajo    | 2015 | B   | Faeces | yes | yes |
| IBE-BC1442 | 40.32822 | -7.58676 | Tajo    | 2015 | A1  | Faeces | yes | yes |
| IBE-BC1480 | 40.34883 | -7.56329 | Tajo    | 2015 | A2a | Faeces | yes | yes |
| IBE-BC1507 | 40.44262 | -7.51313 | Mondego | 2015 | A1  | Faeces | yes | yes |
| IBE-BC1543 | 40.35643 | -7.55865 | Tajo    | 2015 | A1  | Faeces | yes | yes |

---

**Table S2.** Mitochondrial genetic diversity statistics of the cytochrome *b* (Cytb) and D-loop fragments of *Neomys anomalus* calculated for all the samples and for the four main mitochondrial phylogroups (A and B). N = number of sequences; S = number of segregating sites; h = number of haplotypes; Hd = haplotype diversity;  $\pi$  = nucleotide diversity per site;  $\emptyset$  = Watterson's estimator of nucleotide diversity per site.

|             | Cytb<br>(All) | Cytb<br>(A) | Cytb<br>(B) | D-loop<br>(All) | D-loop<br>(A) | D-loop<br>(B) |
|-------------|---------------|-------------|-------------|-----------------|---------------|---------------|
| N           | 132           | 78          | 54          | 103             | 65            | 38            |
| S           | 64            | 49          | 13          | 82              | 65            | 45            |
| h           | 50            | 35          | 15          | 65              | 41            | 24            |
| Hd          | 0.96          | 0.96        | 0.83        | 0.98            | 0.98          | 0.96          |
| $\pi$       | 0.0083        | 0.0068      | 0.0020      | 0.0455          | 0.0386        | 0.0362        |
| $\emptyset$ | 0.0138        | 0.0116      | 0.0033      | 0.0511          | 0.0439        | 0.0338        |

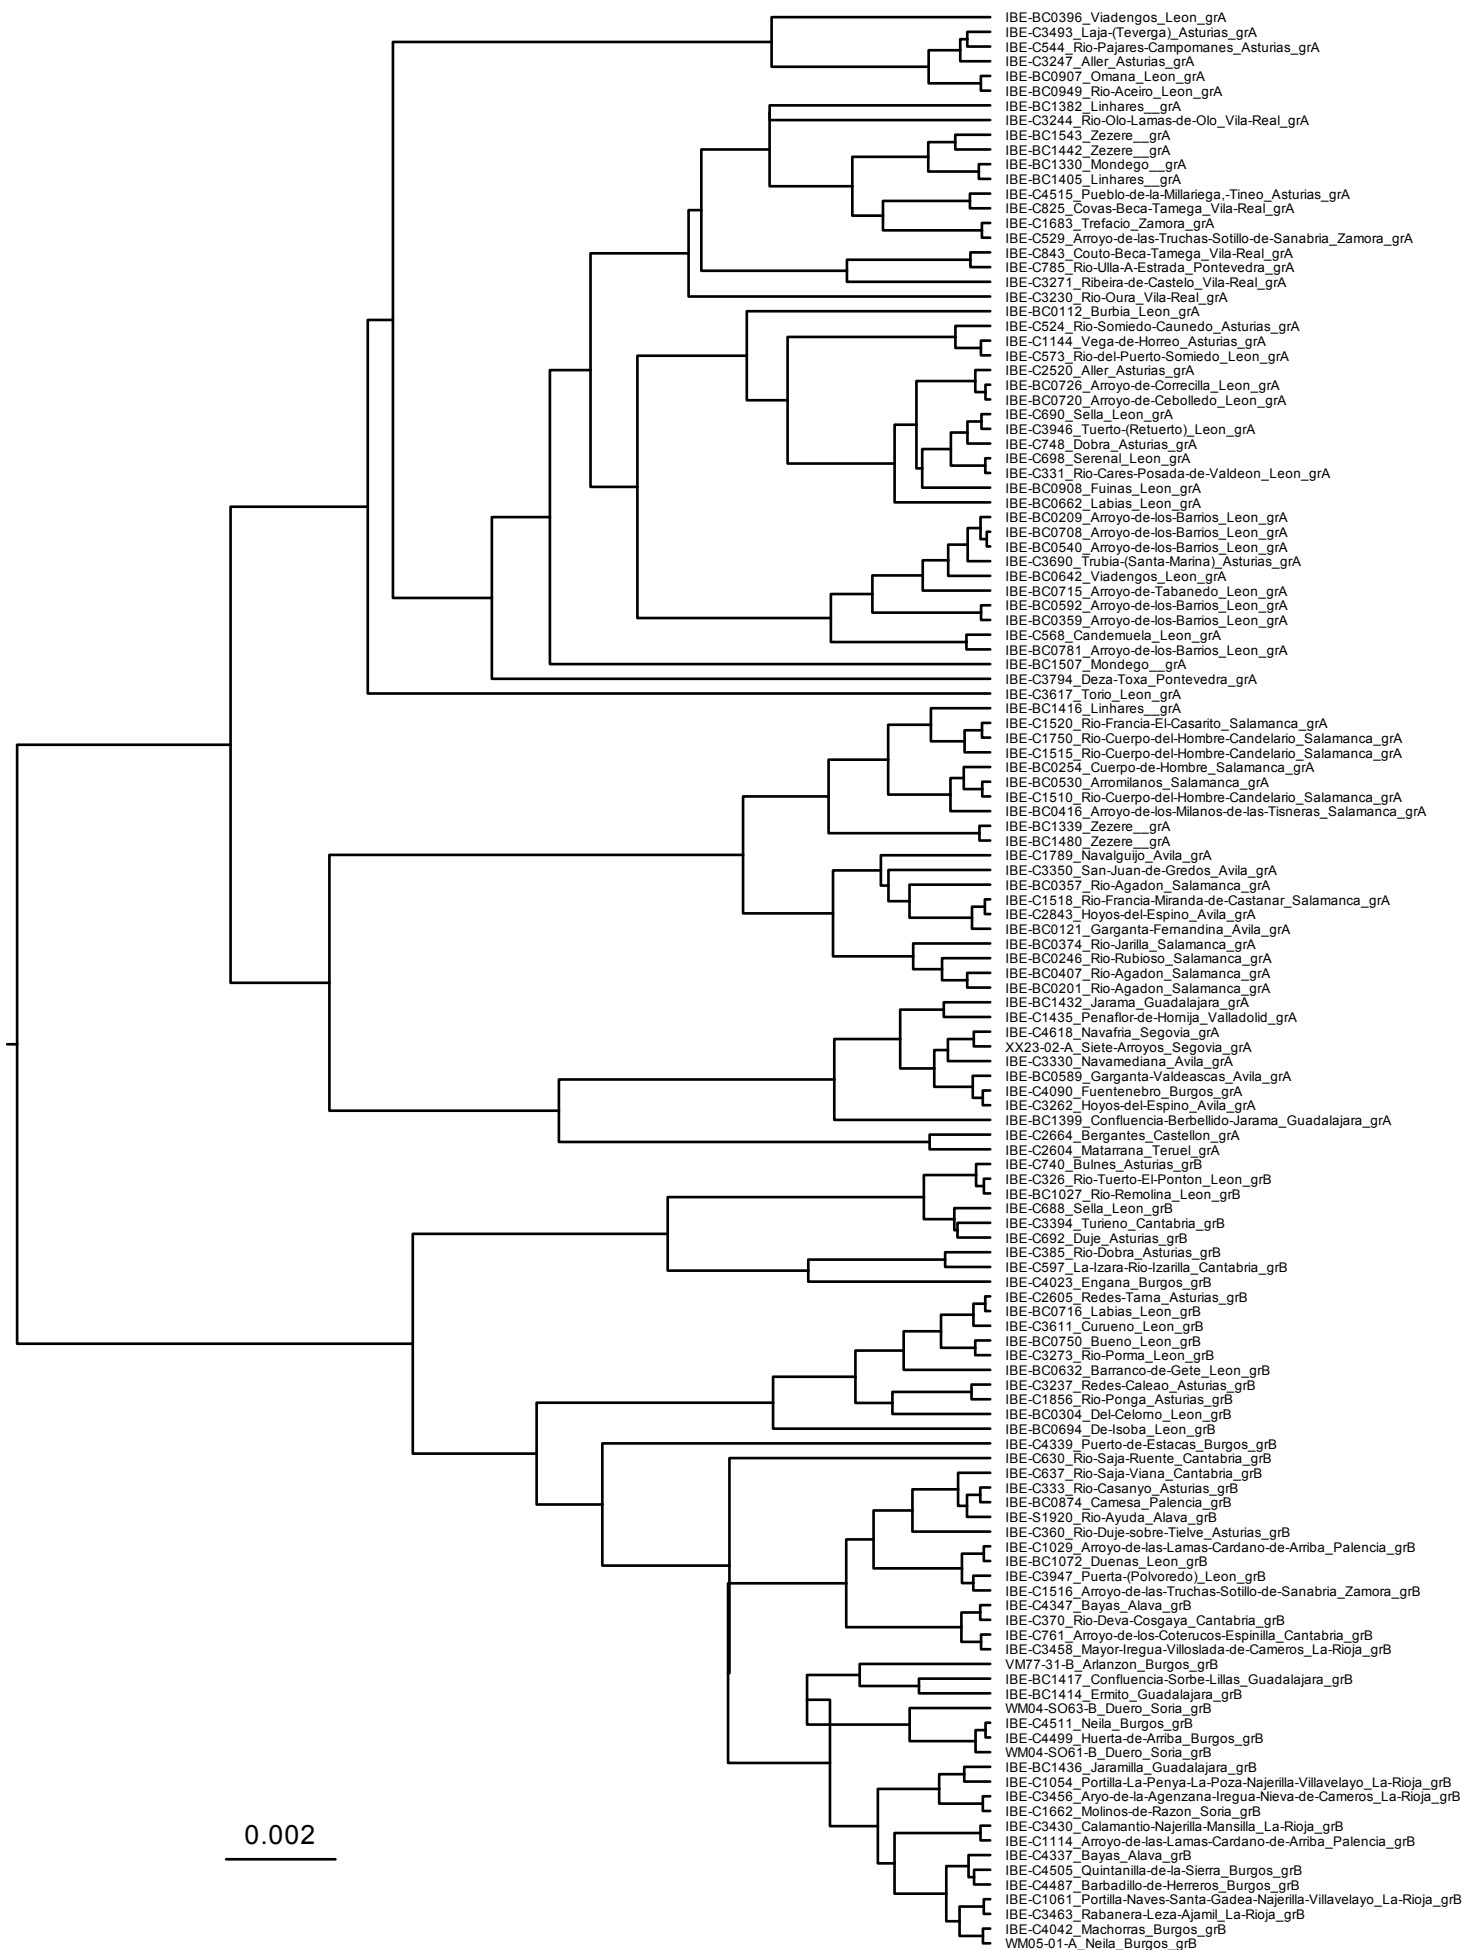

**Figure S1.** Beast tree with tips labeled with sample codes and locality information (locality and province). The scale bar is in substitutions per position.

**A. Current**

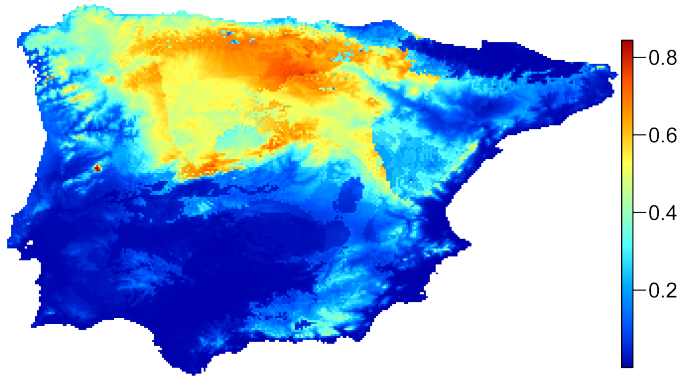

**B. CCSM**

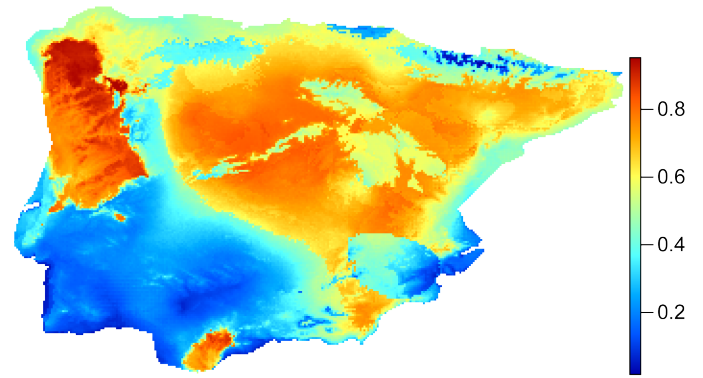

**C. MIROC**

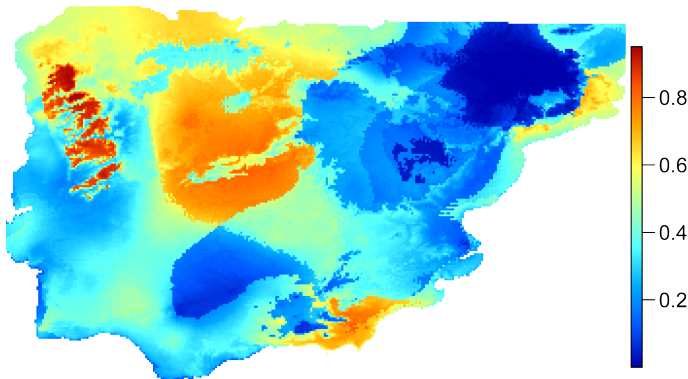

**D. MSPI**

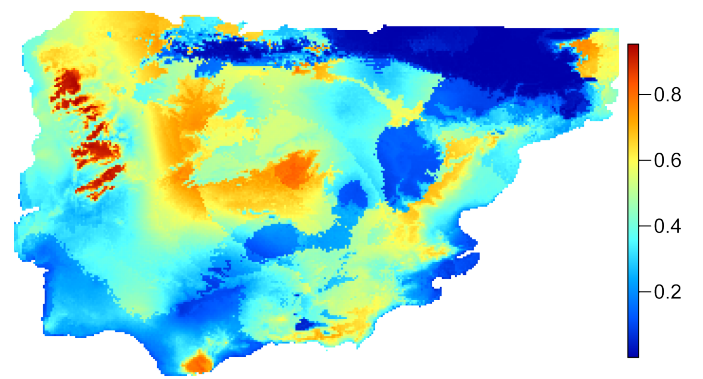

**Figure S2.** Projection of the species distribution model to the current climate scenario (A) and to the Last Glacial climatic models: CCSM (B), MIROC (C) and MSPI (D).
